# Supplementary material
Source: PubMed Central journal article supplement (PMC7954003)

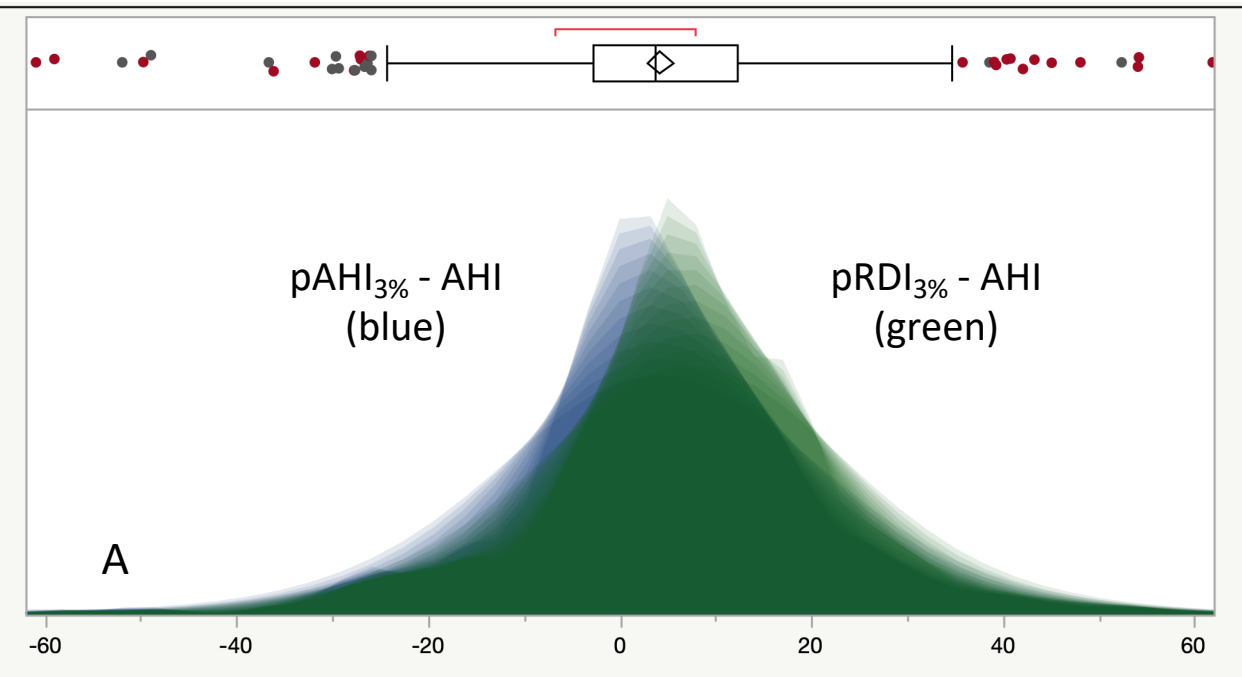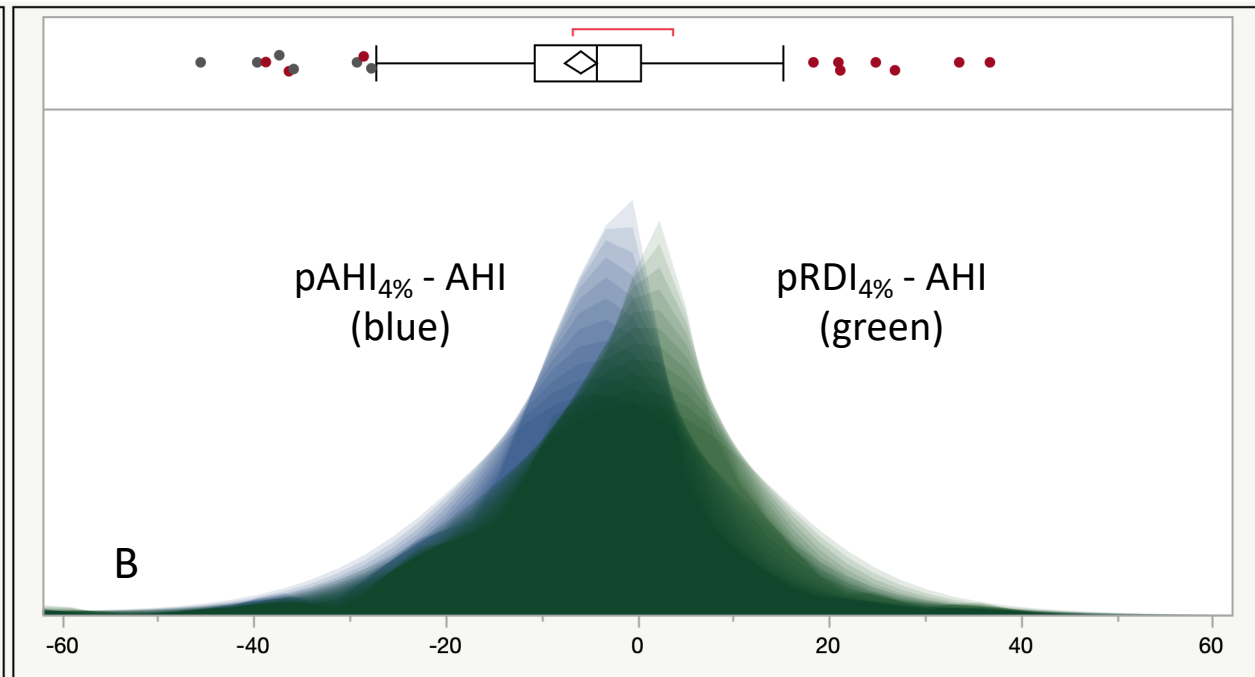

Supplement: jcsm.8620.ds001.pdf [file jcsm.8620.ds001.pdf]
